# Supplementary material
Source: PubMed Central journal article supplement (PMC8672179)

Uncropped images of gels shown in Figure 2

**Fig. 2B** RIF1 levels in Rif1 KO cells

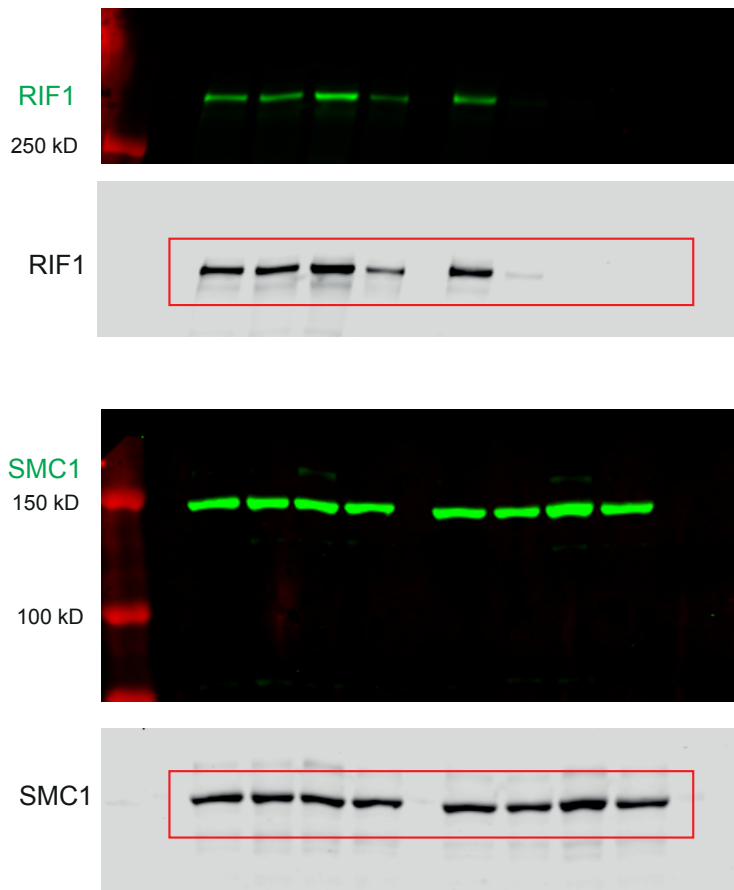

Uncropped images of gels shown in Figure 6

**Fig. 6D** KAP1 levels in Kap1 KD Fa2L cells

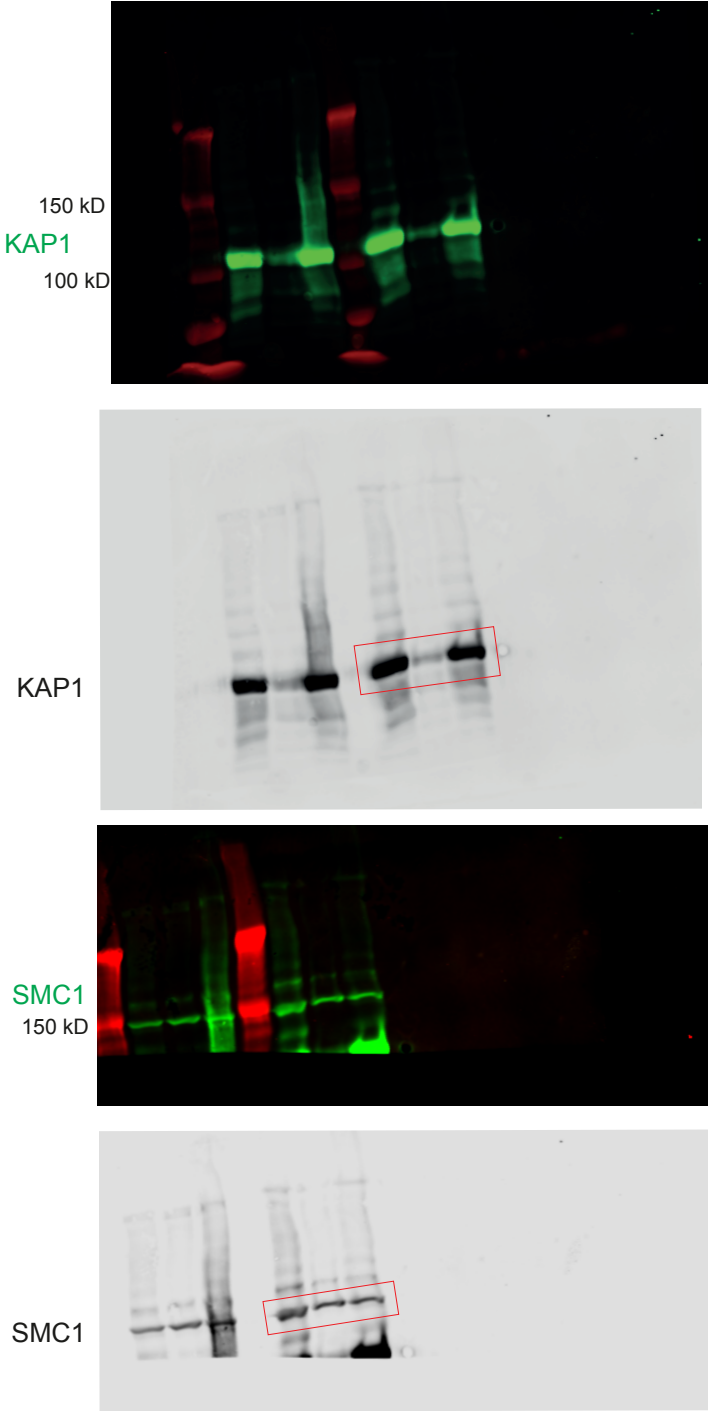

# Uncropped images of gels shown in EV4

**Fig. EV4D** RIF1 levels in Kap1 KD cells

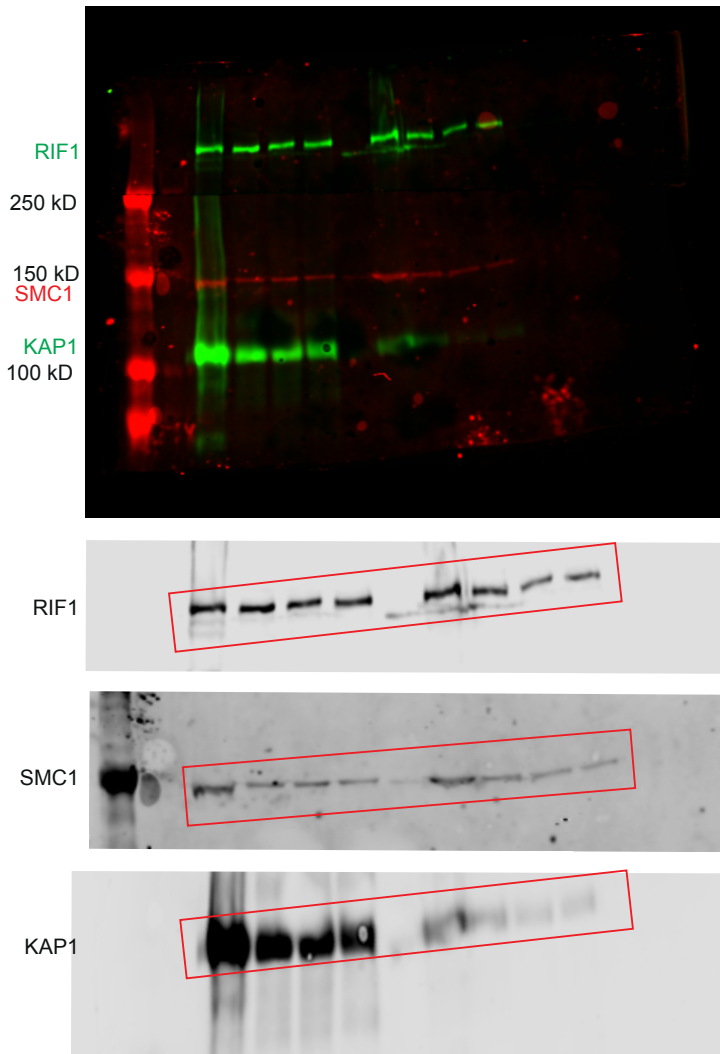

**Fig. EV4E** RNF12 levels in Kap1 KD cells

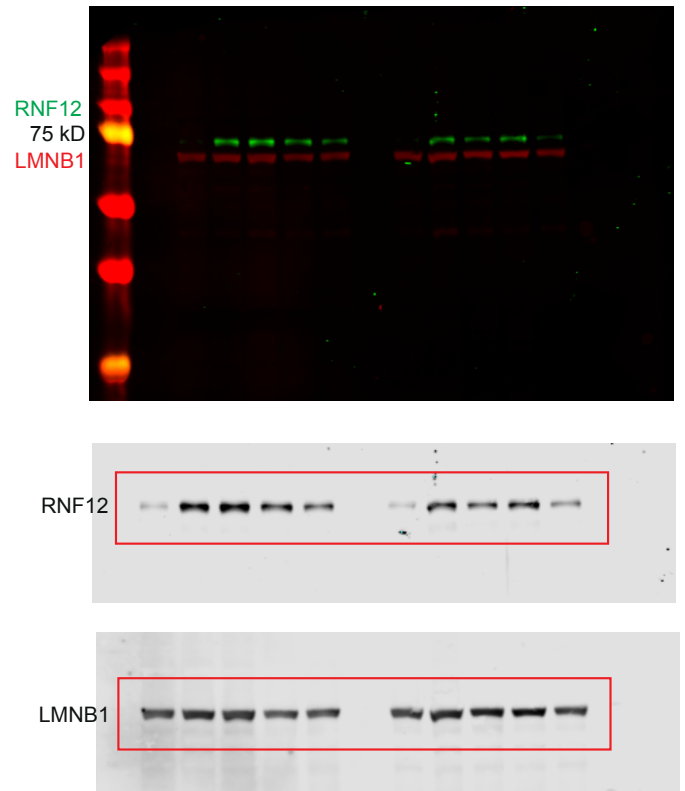

Uncropped images of gels shown in Figure EV5\_1

**Fig. EV5A** KAP1 levels in Rif1 KO cells

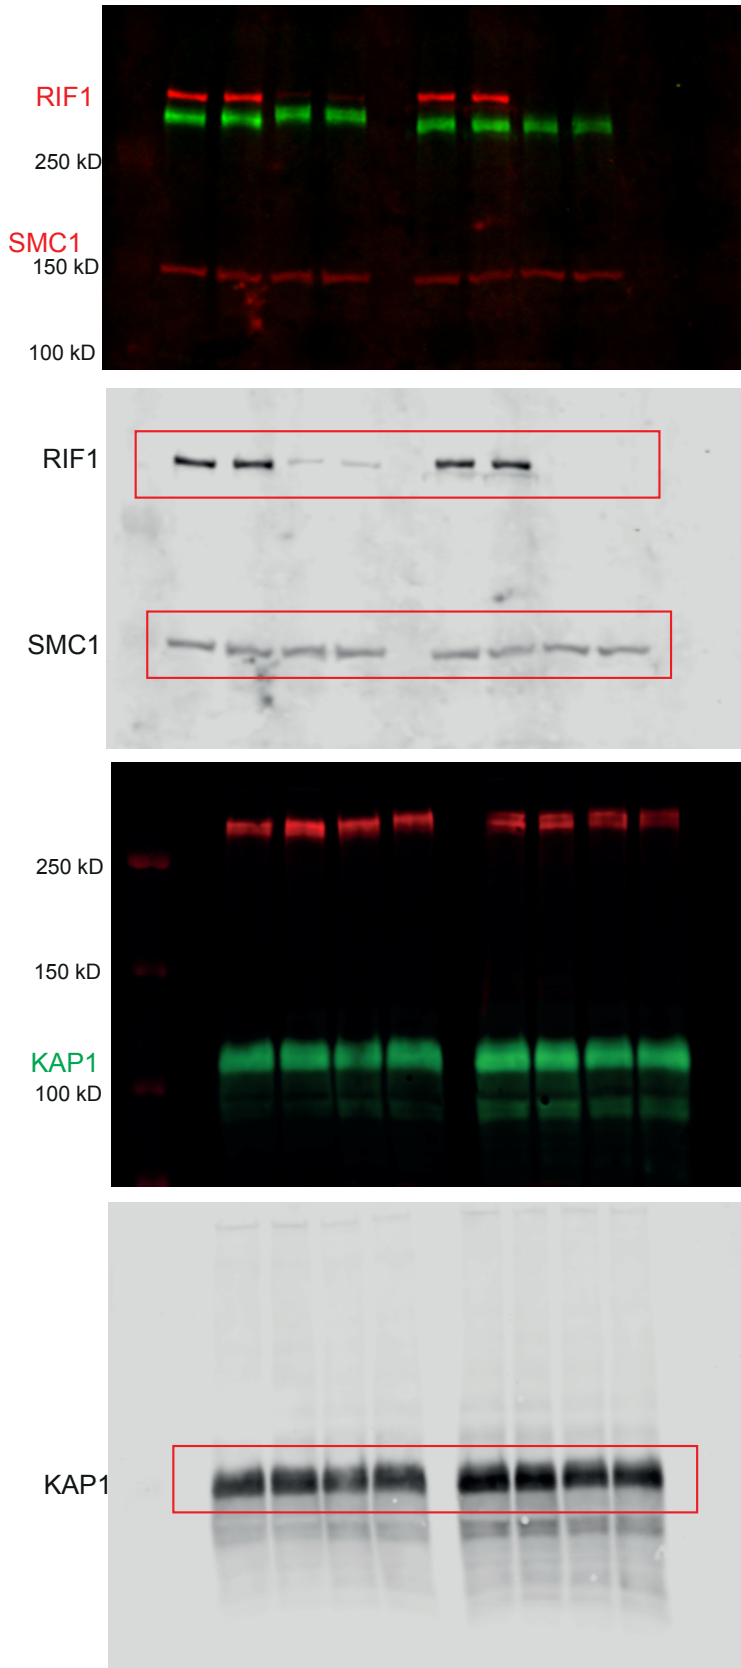

**Fig. EV5B** Cell fractionation

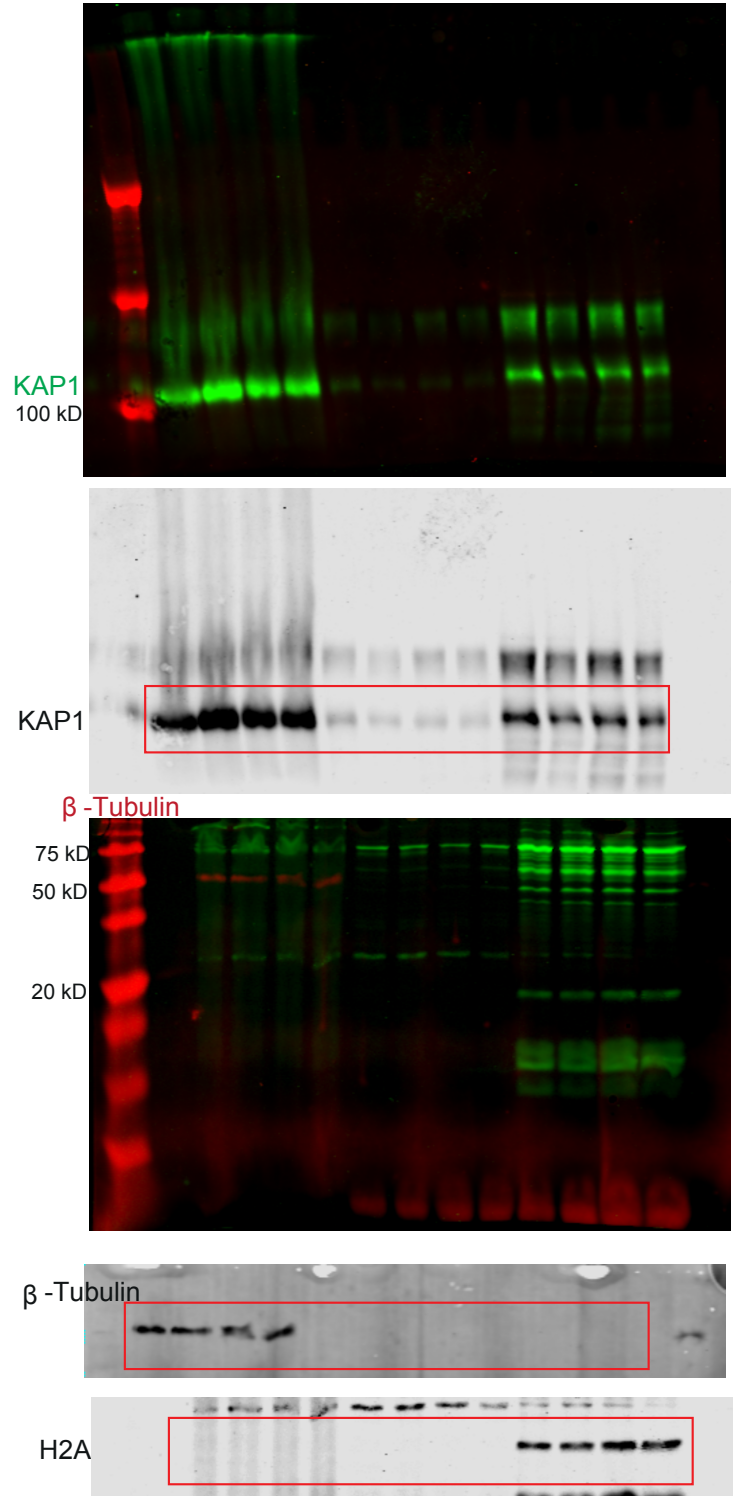

Uncropped images of gels shown in Figure EV5\_2

Fig. EV5D RIF1 levels in Rif1 KD cells

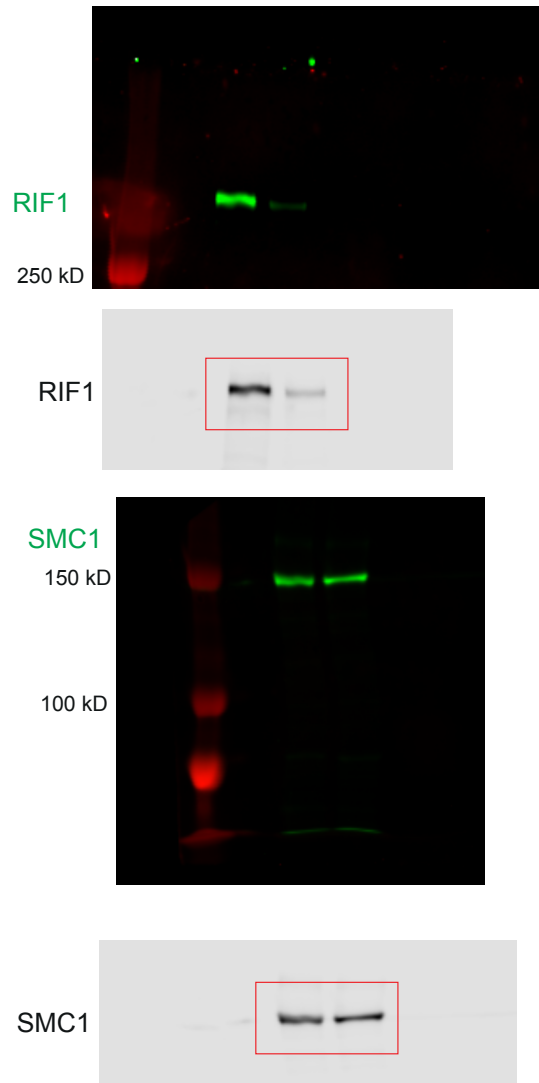

Uncropped images of gels shown in Appendix Figure S2

Appendix Fig. S2B RNF12 levels in Rif1 KO cells

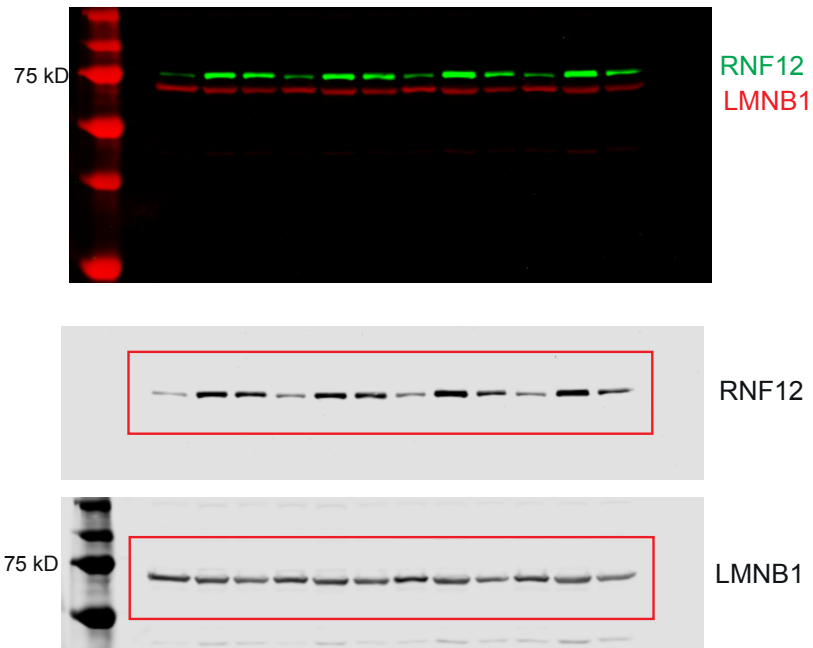

Uncropped images of gels shown in Appendix Figure S3

**Appendix Fig. S3C** RIF1 levels in Rif1 KD Fa2L cells

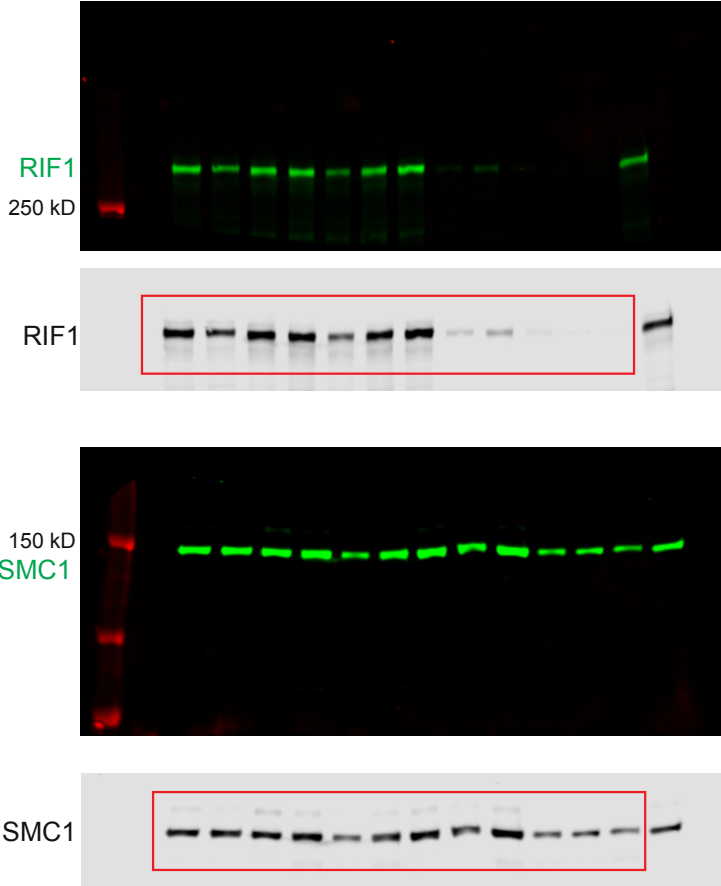

## Uncropped images of gels shown in Appendix Figure S4

**Appendix Fig. S4B** KAP1 levels in Kap1 KD cells

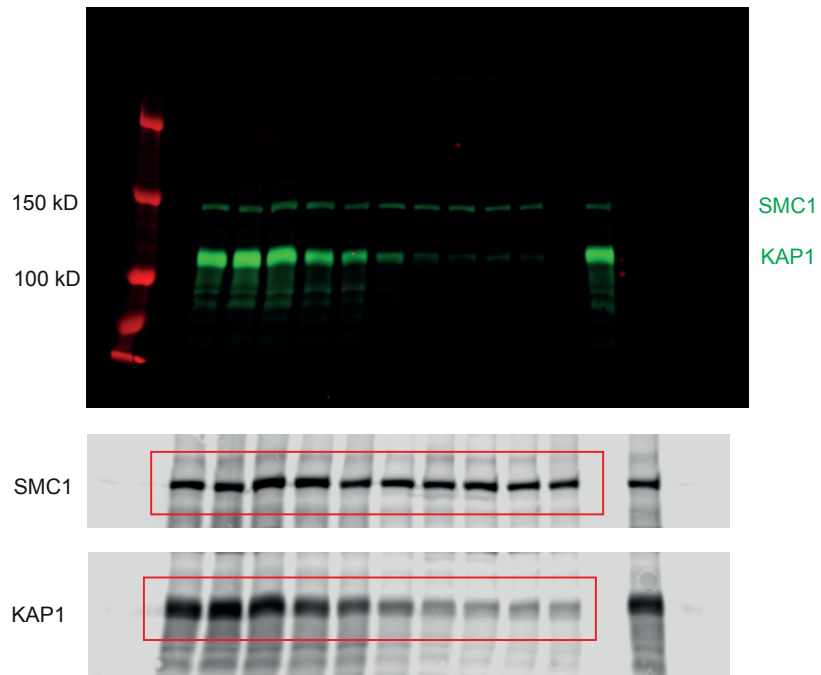

**Appendix Fig. S4C** KAP1 levels in Kap1 KD Fa2L cells

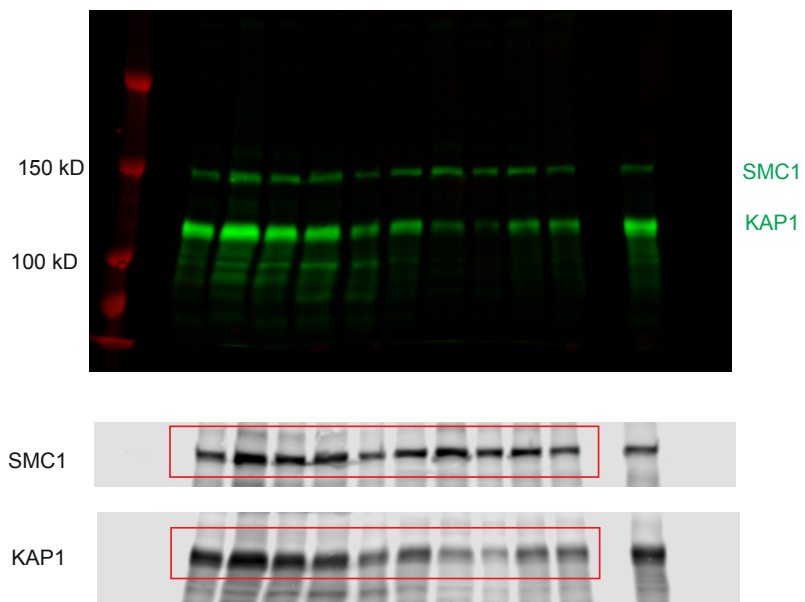

Supplement: EMBJ-40-e105862-s006.pdf [file EMBJ-40-e105862-s006.pdf]
